# Supplementary material for: Adhesive functionalized ascorbic acid on CoFe2O4: a core–shell nanomagnetic heterostructure for the synthesis of aldoximes and amines
Source: Royal Society of Chemistry journal article supplement (doi:10.1039/d0ra08244a), 2020-01-01
Supplement: d0ra08244a1.pdf [file d0ra08244a1.pdf]

## Supplementary

### Adhesive functionalized ascorbic acid on $\text{CoFe}_2\text{O}_4$ : a core-shell nanomagnetic heterostructure for the synthesis of aldoximes and amines

Serve Sorkhabi<sup>a</sup>, Mohammad Ghadermazi<sup>\*a</sup> and Roya Mozafari<sup>a</sup>

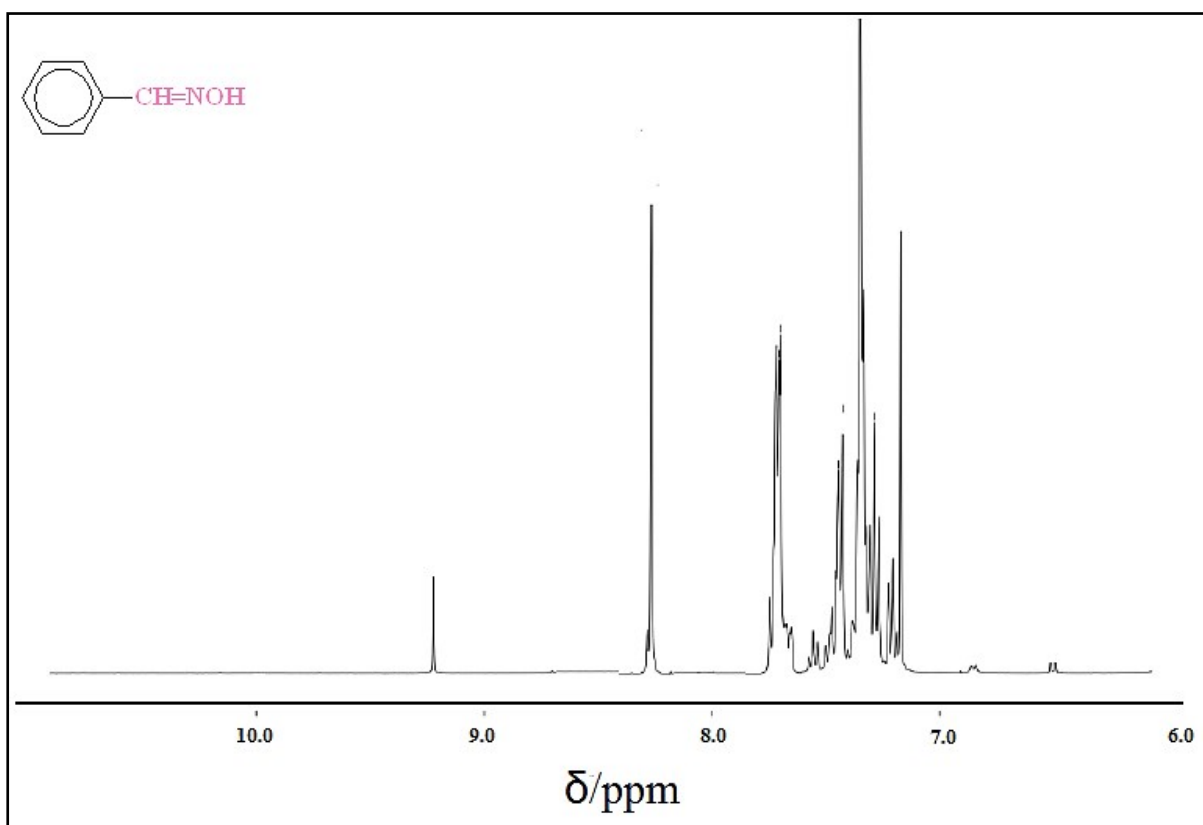

<sup>1</sup>H NMR of benzaldoxime

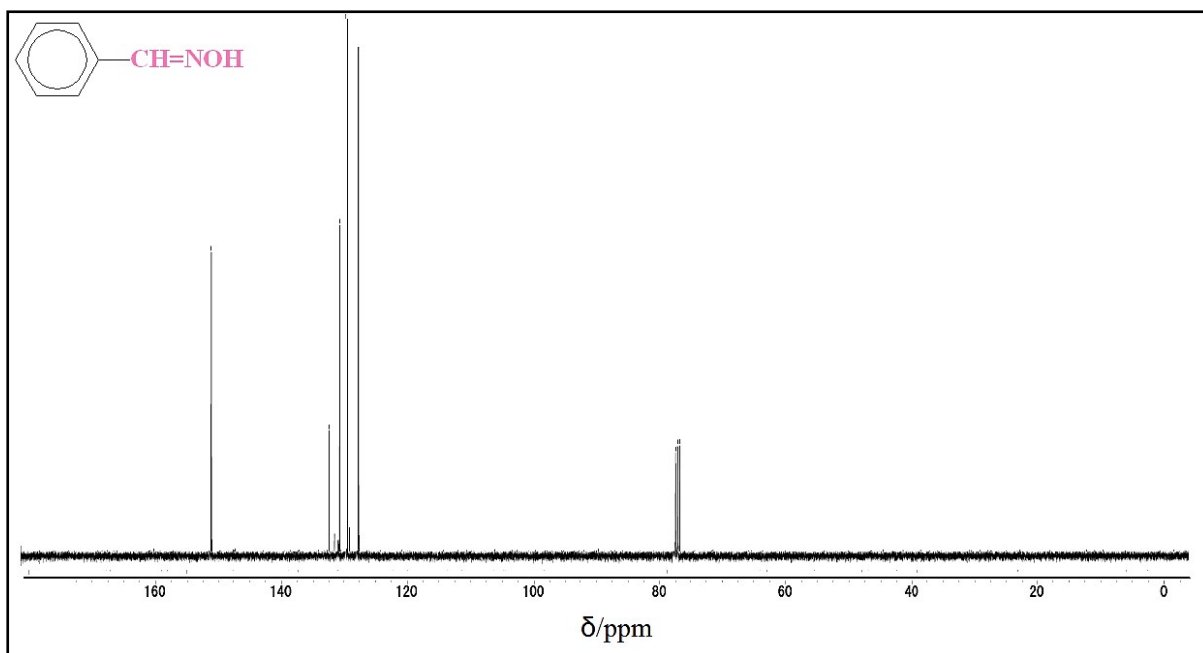

<sup>13</sup>CNMR of benzaldoxime

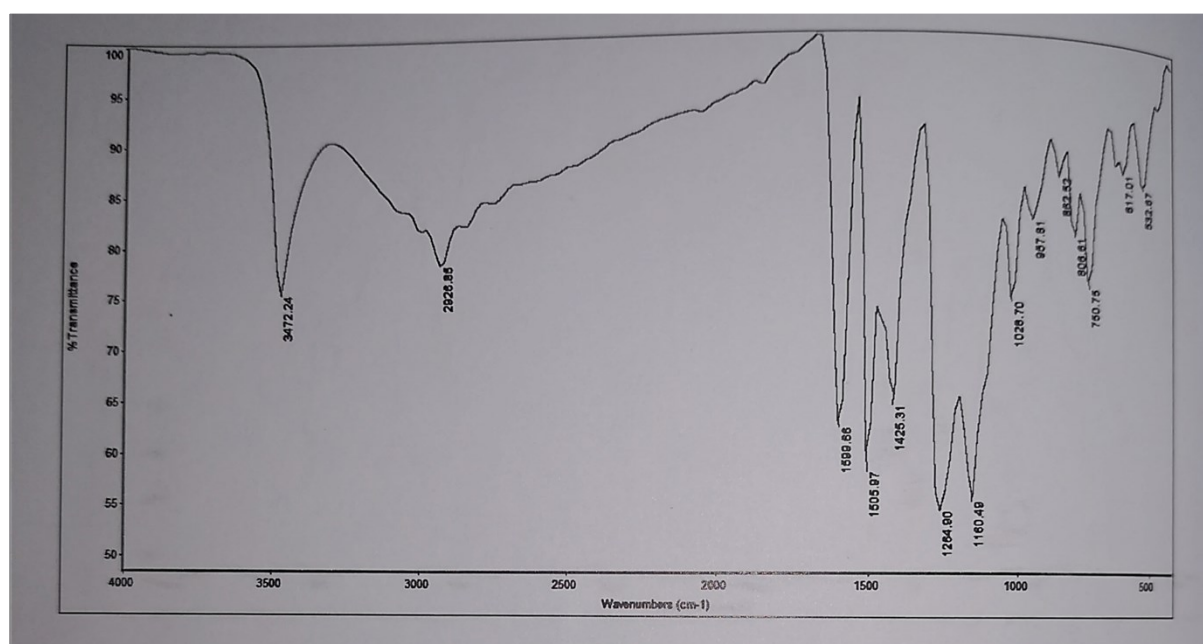

FT-IR of benzaldoxime

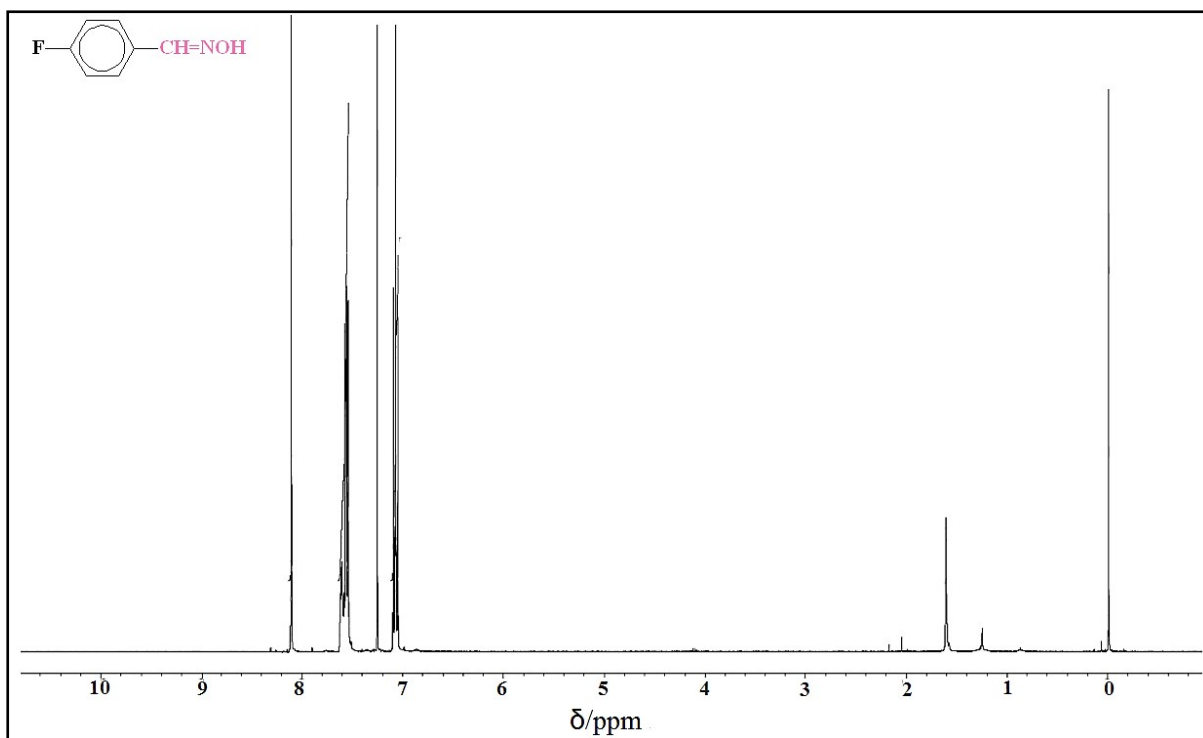

<sup>1</sup>H NMR of 4-fluorobenzaldoxime

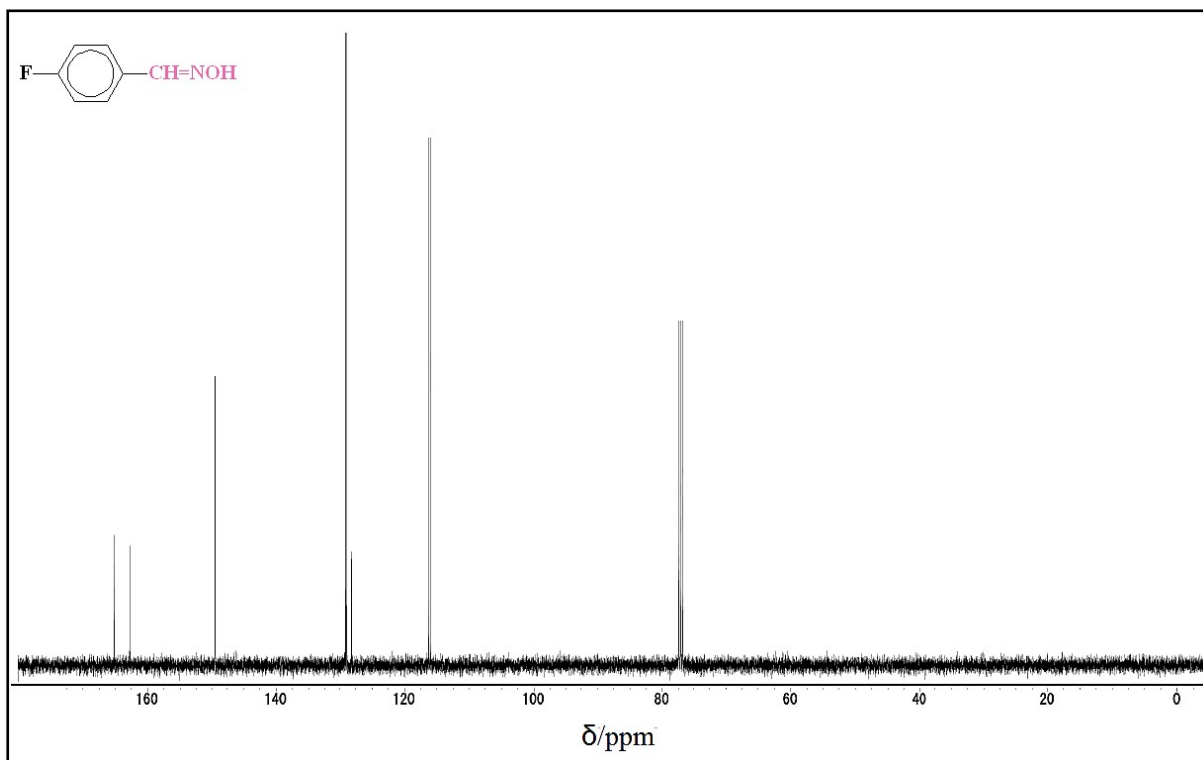

<sup>13</sup>C NMR of 4-fluorobenzaldoxime

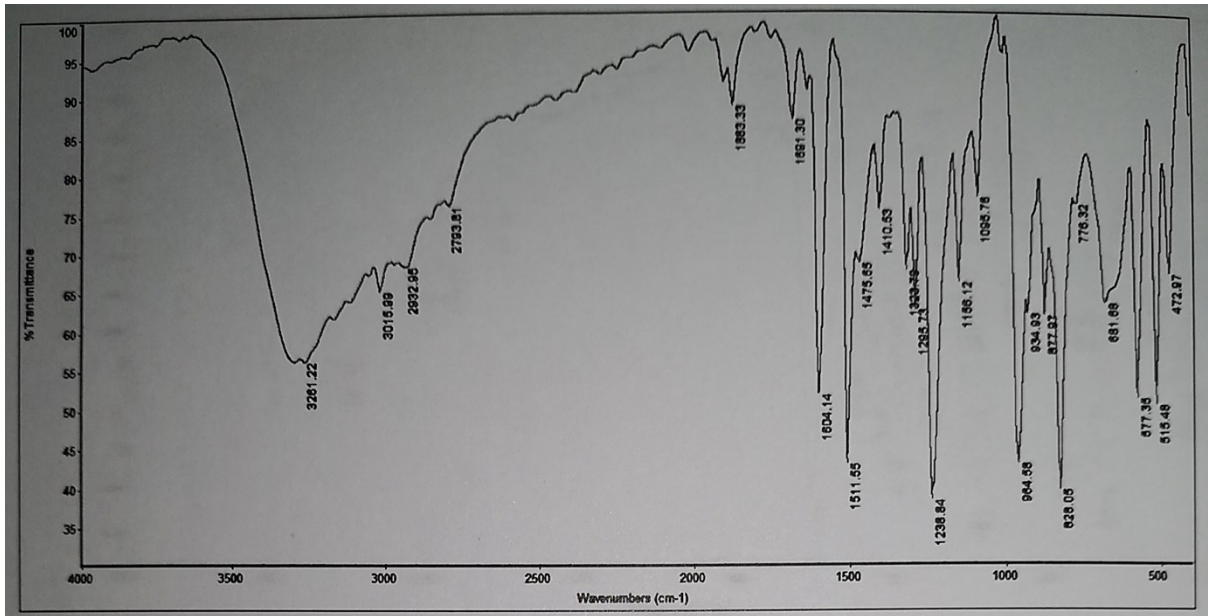

FT-IR of 4-fluorobenzaldoxime

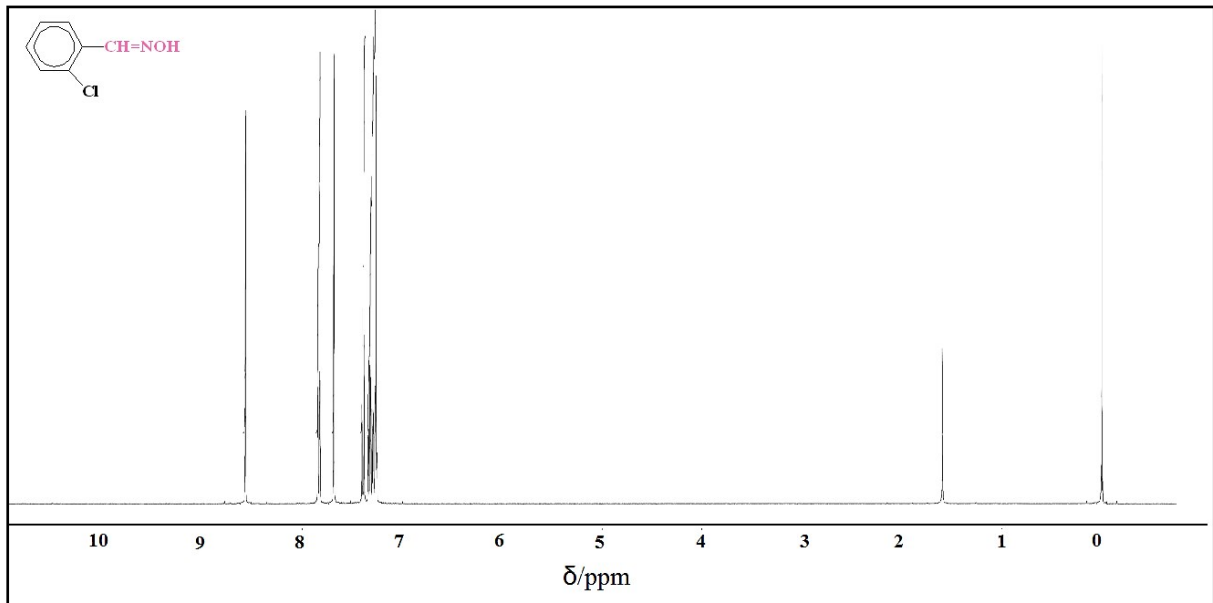

<sup>1</sup>H NMR of 2-Chlorobenzaldoxime

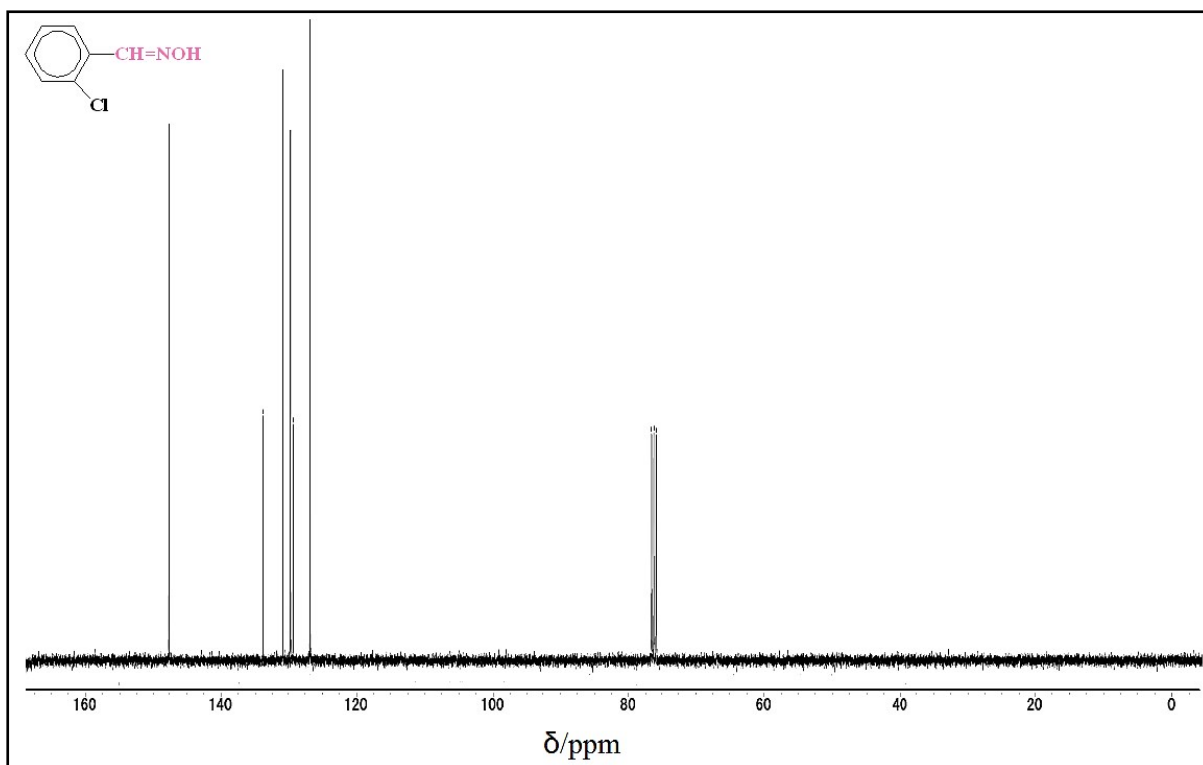

$^{13}\text{C}$ NMR of 2-Chlorobenzaldoxime

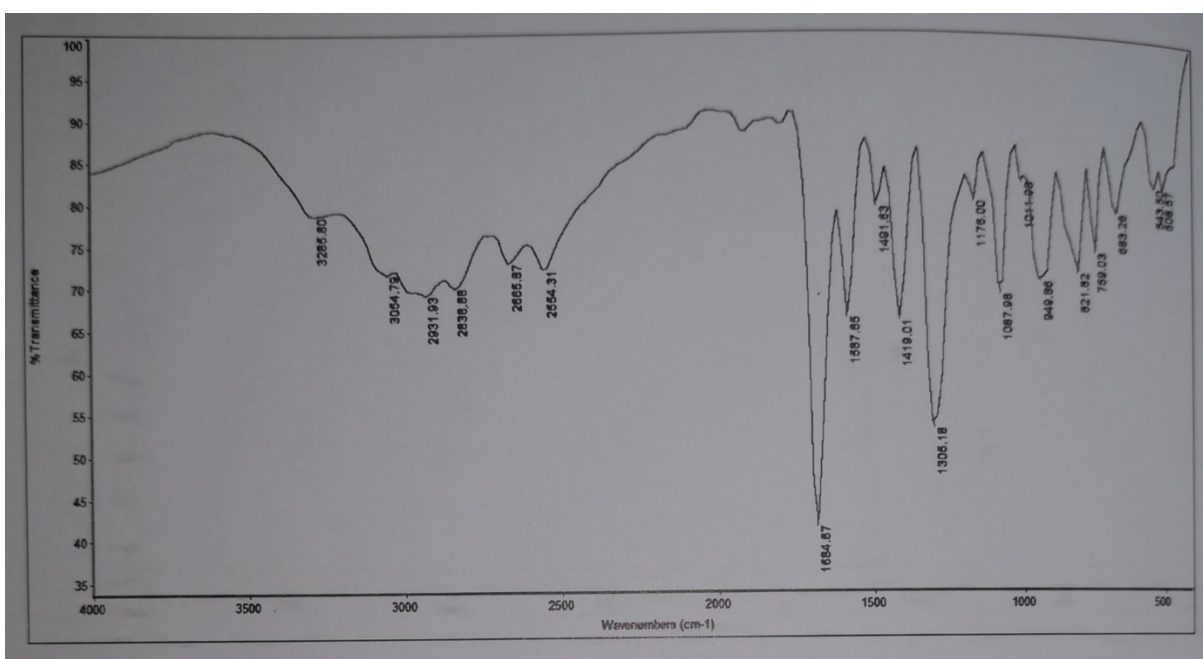

FT-IR of 2-Chlorobenzaldoxime

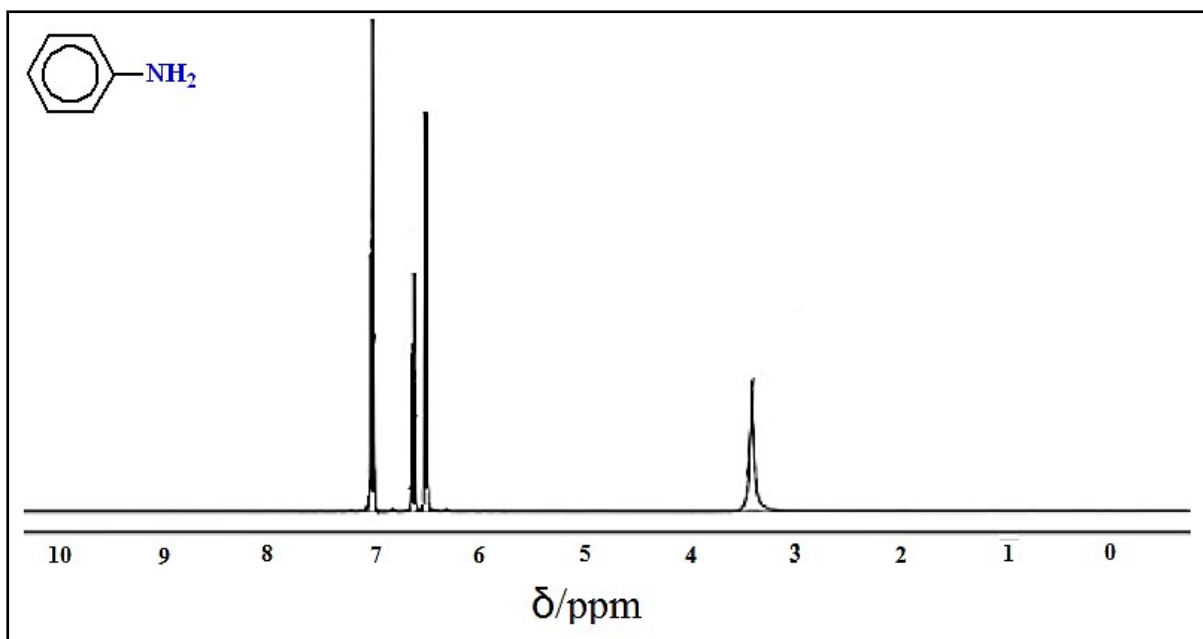

<sup>1</sup>H NMR of aniline

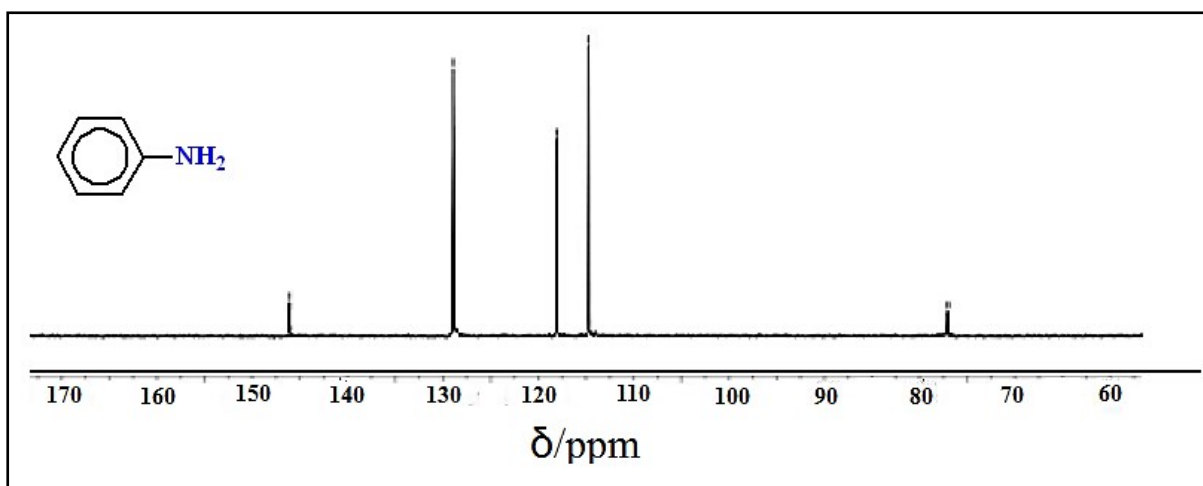

<sup>13</sup>C NMR of aniline

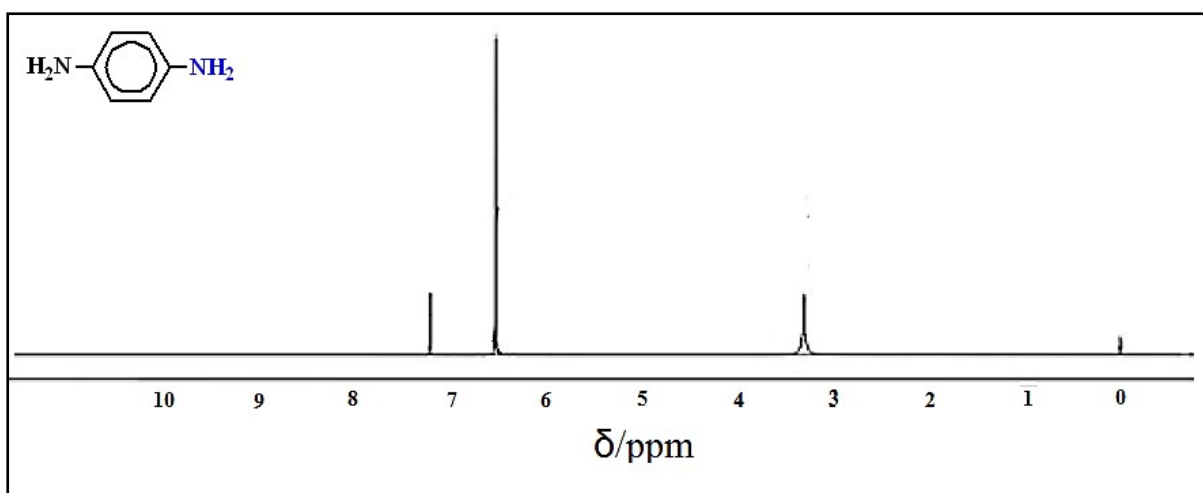

<sup>1</sup>H NMR of benzene-1,4-diamine

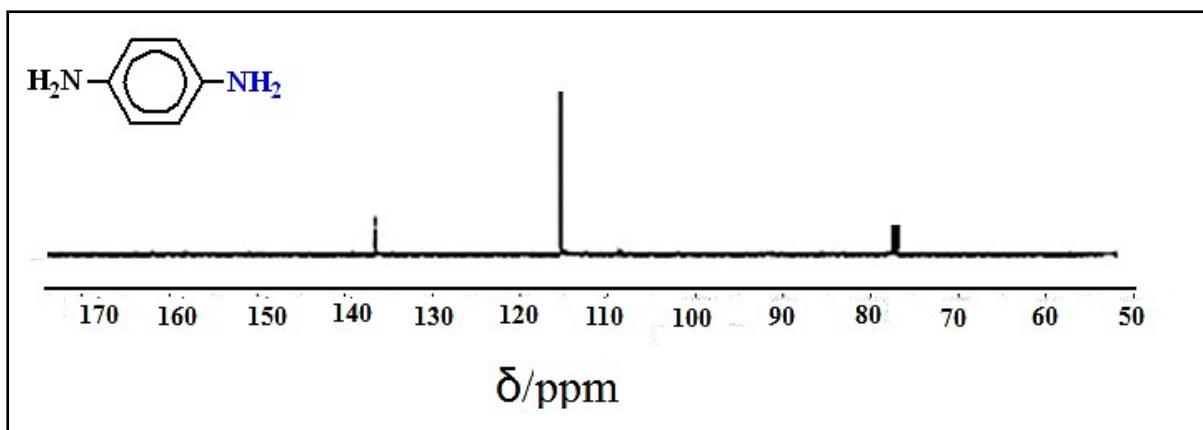

$^{13}\text{C}$ NMR of benzenel,4-diamine

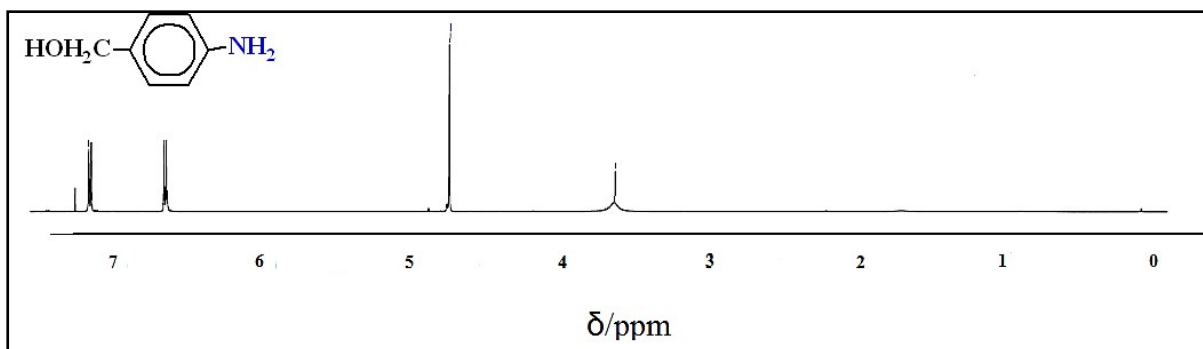

$^1\text{H}$ NMR of 4-hydroxymethylaniline

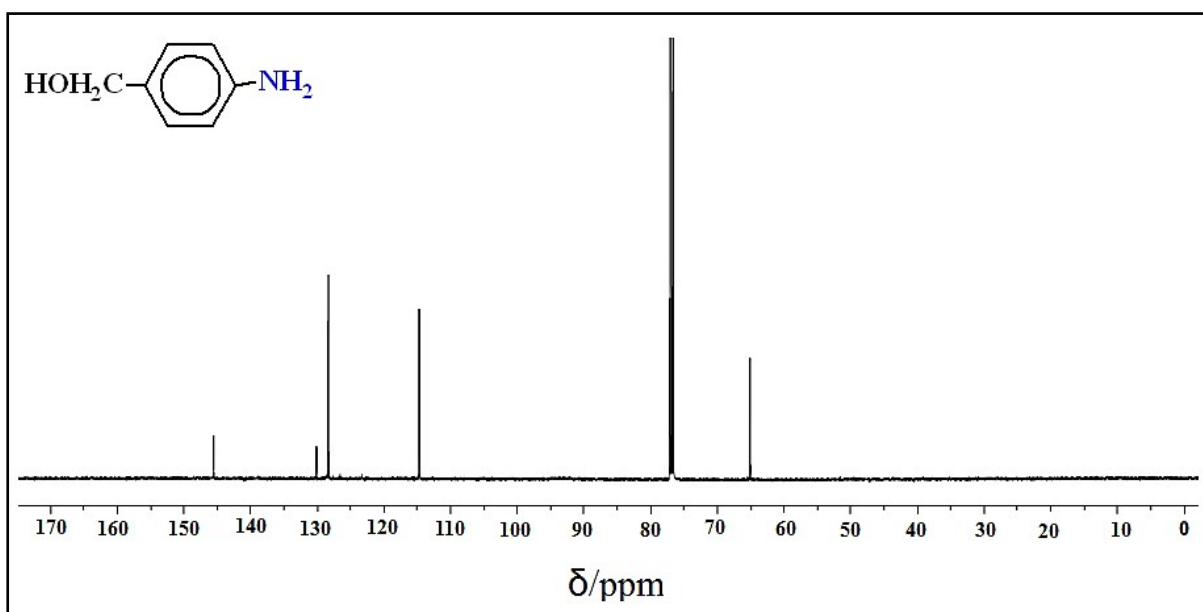

$^{13}\text{C}$ NMR of 4-hydroxymethylaniline

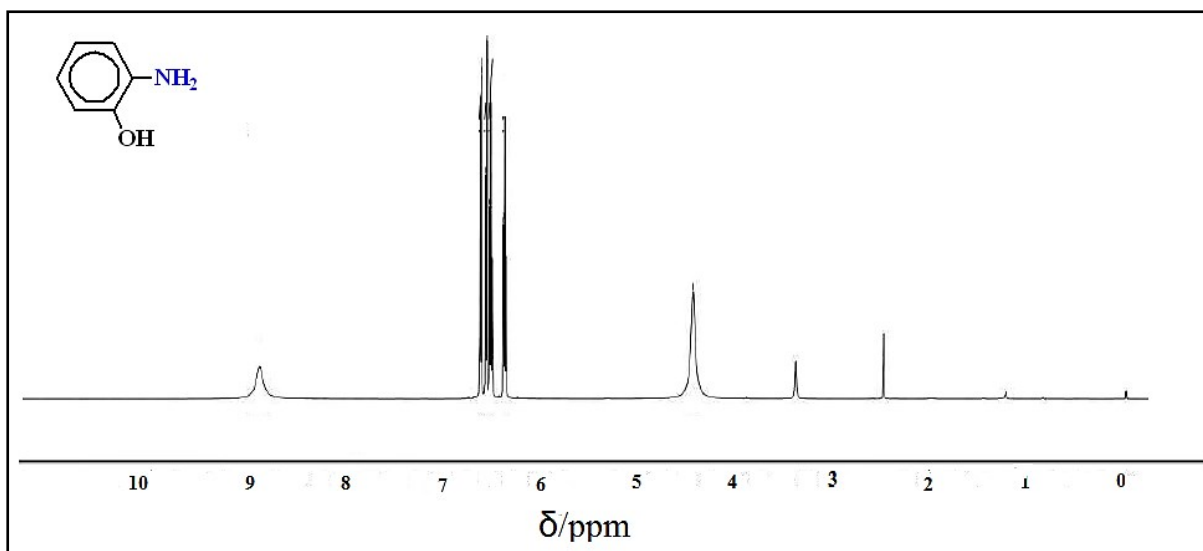

<sup>1</sup>H NMR of 2-aminophenol

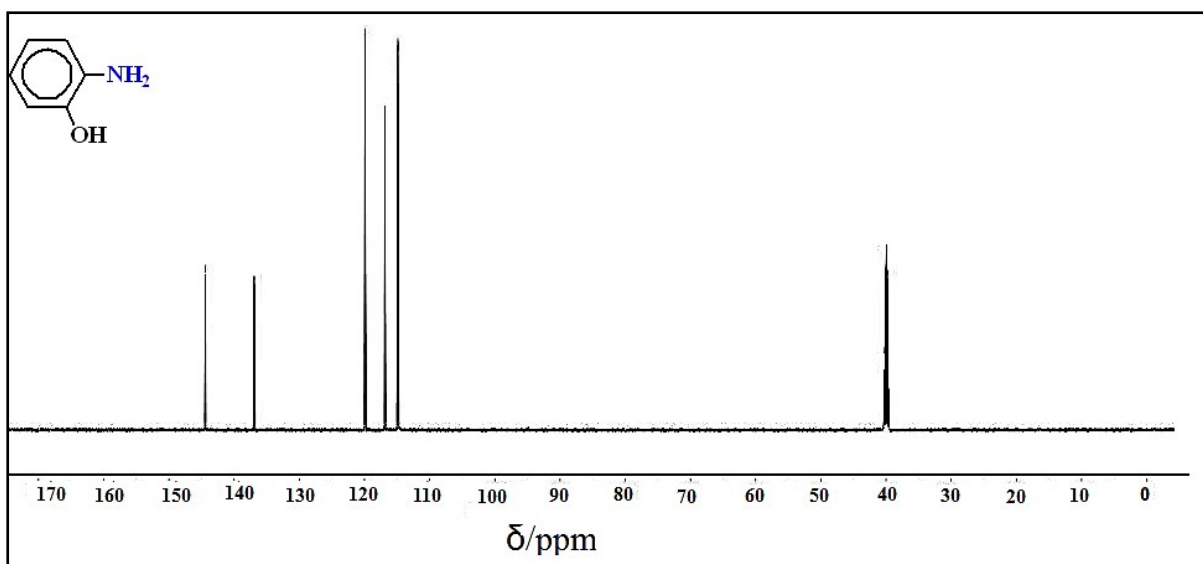

<sup>13</sup>C NMR of 2-aminophenol
